# Supplementary material for: Agreement between self-reported and researcher-measured height, weight and blood pressure measurements for online prescription of the combined oral contraceptive pill: an observational study
Source: HighWire-hosted journal article supplement (doi:10.1136/bmjopen-2021-054981), 2022-05-01
Supplement: bmjopen-2021-054981supp001_data_supplement.pdf [file bmjopen-2021-054981supp001_data_supplement.pdf]

## Supplementary material

### A. Process of BP measurement and examples from free text answers

| Process of blood pressure measurement | Example                                                                                                                                                                                                                                                                                                                                                                                                                                                                                                                                                                                                                                                             |
|---------------------------------------|---------------------------------------------------------------------------------------------------------------------------------------------------------------------------------------------------------------------------------------------------------------------------------------------------------------------------------------------------------------------------------------------------------------------------------------------------------------------------------------------------------------------------------------------------------------------------------------------------------------------------------------------------------------------|
| Unclassifiable                        | <ul style="list-style-type: none"> <li>- I have a blood pressure monitor at home (date given between order and research visit)</li> <li>- "My blood pressure was measured by a colleague at work (12 days before order)</li> <li>- "[South East London Clinic] (date given between order and research visit)"</li> <li>- "I have a nurse at my office that offer blood pressure testing so I used the facilities provided to check (date given between order and research visit)"</li> <li>- "I visited the pharmacy stand in boots. They took me to a private room and took my blood pressure for me (date given between order and research visit)"</li> </ul>     |
| Clinically appropriate                | <ul style="list-style-type: none"> <li>- "From my GP when I was first prescribed the pill (3 months before order)"</li> <li>- "The nurse in the clinic took my blood pressure (same day as order)"</li> <li>- "Inherited blood pressure machine from relative with long term illness who no longer needed it. Used this at home to obtain measure (4 days before order)</li> <li>- "I visited my aunts house to get my blood pressure reading since she has a machine at home (day before order)</li> <li>- "I went to my local pharmacy where they had a self checker machine that calculated my blood pressure, weight and height (same day as order)"</li> </ul> |
| Clinically inappropriate              | <ul style="list-style-type: none"> <li>- "At the GP before getting a repeat prescription of the pill, which was measured normally (18 months before order)"</li> <li>- "A bupa nurse came into my place of work and offered a health check. My blood pressure was taken there (2 years before order)</li> <li>- "I looked up what a healthy blood pressure would be on NHS website and put in that blood pressure when on the sh:24 website"</li> <li>- "Estimated. Had a blood pressure machine but feel I did not use it correctly"</li> <li>- "Googled healthy blood pressure"</li> </ul>                                                                        |

## B. Self-reported and researcher-measured BMI

|                   |                            | Measured BMI            |                            |       |
|-------------------|----------------------------|-------------------------|----------------------------|-------|
|                   |                            | UKMEC 1&2<br><35.0 kg/m | UKMEC 3&4<br>> or= 35 kg/m | Total |
| Self-reported BMI | UKMEC 1&2<br><35.0 kg/m    | 358                     | 1                          | 359   |
|                   | UKMEC 3&4<br>> or= 35 kg/m | 2                       | 4                          | 6     |
|                   | Total                      | 360                     | 5                          | 365   |

## C. Self-reported and researcher-measured BP

|                                     |              | Researcher-measured blood pressure (mmHg) |               |       |
|-------------------------------------|--------------|-------------------------------------------|---------------|-------|
|                                     |              | < 140/90                                  | > or = 140/90 | Total |
| Self-reported blood pressure (mmHg) | <140/90      | 344                                       | 10            | 354   |
|                                     | > or= 140/90 | 10                                        | 1             | 11    |
|                                     | Total        | 354                                       | 11            | 365   |

## D. SMS invitation message

"Hello. SH:24 are working with King's College Hospital to improve contraception services. King's would like to invite you to take part in their research - they will thank you for your time with £45. The research would involve meeting a member of the King's team to allow them to check your height, weight and blood pressure. You will also be asked to complete a short questionnaire (this should take no more than 40 mins in total). Text back NO if you don't want to receive a call back from the King's research team. Thanks, SH:24"
